# Supplementary material for: Bromotyrosine-Derived Metabolites from a Marine Sponge Inhibit Pseudomonas aeruginosa Biofilms
Source: MDPI journal article supplement (doi:10.3390/ijms241210204), 2023-06-16

## SUPPORTING INFORMATION

### Bromotyrosine-Derived Metabolites from a Marine Sponge Inhibit

#### *Pseudomonas aeruginosa* Biofilms

**Tam M. T. Tran**<sup>1</sup>, **Russell S. Addison**<sup>2</sup>, **Rohan A. Davis**<sup>3,4</sup>, **Bernd H. A. Rehm**<sup>1,5,\*</sup>

<sup>1</sup> Centre for Cell Factories and Biopolymers, Griffith Institute for Drug Discovery, Griffith University, Nathan, QLD 4111, Australia

<sup>2</sup> Preclinical ADME/PK, Griffith Institute for Drug Discovery, Griffith University, Nathan, QLD 4111, Australia

<sup>3</sup> NatureBank, Griffith Institute for Drug Discovery, Griffith University, Nathan, QLD 4111, Australia

<sup>4</sup> School of Environment and Science, Griffith University, Nathan, QLD 4111, Australia

<sup>5</sup> Menzies Health Institute Queensland, Griffith University, Gold Coast, QLD 4222, Australia

\* correspondence: [b.rehm@griffith.edu.au](mailto:b.rehm@griffith.edu.au)

**Table S1.** The degradation of ianthelliformisamine A in mouse liver microsomes.

**Table S2.** Metabolic stability parameters for ianthelliformisamine A in mouse liver microsomes.

**Table S3.** The degradation of ianthelliformisamine B in mouse and human liver microsomes.

**Table S4.** Metabolic stability parameters for ianthelliformisamine B in mouse and human liver microsomes.

**Table S5.** The degradation of ianthelliformisamine C in mouse and human liver microsomes.

**Figure S1.** Metabolic stability parameters for ianthelliformisamine A in mouse liver microsomes.

**Figure S2.** Metabolic stability of ianthelliformisamine B in mouse and human liver microsomes.

**Figure S3.** Metabolic stability of ianthelliformisamine C in mouse and human liver microsomes.

**Table S1.** The results for the degradation of ianthelliformisamine A (**1**) normalized to t = 0) in mouse liver microsomes

| Time<br>(min) | % Remaining |       |
|---------------|-------------|-------|
|               | Mouse       |       |
|               | Mean        | SD    |
| 0             | 100.00      | 0.00  |
| 5             | 93.32       | 14.29 |
| 10            | 96.74       | 27.23 |
| 20            | 66.26       | 19.36 |
| 30            | 57.28       | 20.01 |
| 60            | 53.42       | 17.07 |

**Table S2.** Metabolic stability parameters for ianthelliformisamine A (**1**) based on NADPH-dependent degradation profiles in mouse liver microsomes.

| Parameter                                 | Units             | Result          |
|-------------------------------------------|-------------------|-----------------|
| $k^1$                                     | min <sup>-1</sup> | 0.0218 ± 0.0125 |
| Half life <sup>1</sup>                    | min               | 38.2 ± 17.2     |
| $Cl_{int, in vitro}$                      | μL/min/mg protein | 43.6            |
| $Cl_{int}$                                | mL/min/kg         | 112.5           |
| $Cl_{blood}$                              | mL/min/kg         | 58.1            |
| Hepatic Extraction ( $E_H$ ) <sup>2</sup> | ---               | 0.48            |

<sup>1</sup> mean ± SD, n = 3

<sup>2</sup> based on mean data for k

**Table S3.** The results for the degradation of ianthelliformisamine B (**2**) (normalized to t = 0) in mouse and human liver microsomes.

| Time (min) | % Remaining |       |        |       |
|------------|-------------|-------|--------|-------|
|            | Mouse       |       | Human  |       |
|            | Mean        | SD    | Mean   | SD    |
| 0          | 100.00      | 0     | 100.00 | 0     |
| 5          | 153.98      | 14.66 | 112.15 | 16.61 |
| 10         | 160.70      | 65.50 | 98.42  | 9.88  |
| 20         | 138.91      | 39.12 | 80.61  | 3.04  |
| 30         | 119.60      | 41.51 | 68.41  | 7.28  |
| 60         | 122.66      | 35.50 | 76.42  | 16.88 |

**Table S4.** Metabolic stability parameters for ianthelliformisamine B (**2**) based on NADPH-dependent degradation profiles in mouse and human liver microsomes.

| Parameter                                 | Units             | Mouse           | Human           |
|-------------------------------------------|-------------------|-----------------|-----------------|
| $k^1$                                     | min <sup>-1</sup> | 0.0165 ± 0.0030 | 0.0195 ± 0.0011 |
| Half life <sup>1</sup>                    | min               | 42.8 ± 7.6      | 35.7 ± 2.1      |
| $Cl_{int, in vitro}$                      | μL/min/mg protein | 33.0            | 39.0            |
| $Cl_{int}$                                | mL/min/kg         | 85.1            | 32.1            |
| $Cl_{blood}$                              | mL/min/kg         | 49.8            | 12.6            |
| Hepatic Extraction ( $E_H$ ) <sup>2</sup> | ---               | 0.42            | 0.61            |

<sup>1</sup> mean ± SD, n = 3

<sup>2</sup> based on mean data for k

**Table S5.** The results for the degradation of ianthelliformisamine C (**3**) normalized to t = 0) in mouse and human liver microsomes.

| Time (min) | % Remaining |        |        |        |
|------------|-------------|--------|--------|--------|
|            | Mouse       |        | Human  |        |
|            | Mean        | SD     | Mean   | SD     |
| 0          | 100.00      | 0      | 100.00 | 0      |
| 5          | 102.69      | 7.394  | 105.22 | 7.357  |
| 10         | 107.54      | 14.67  | 102.09 | 11.38  |
| 20         | 106.48      | 7.882  | 104.88 | 18.772 |
| 30         | 107.42      | 7.931  | 101.07 | 10.566 |
| 60         | 95.80       | 13.574 | 99.19  | 3.752  |

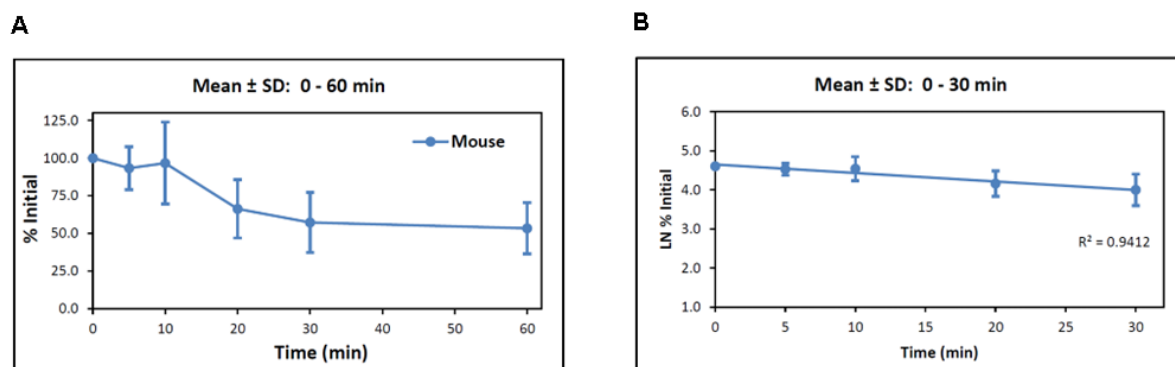

**Figure S1.** (A) Metabolic stability parameters for ianthelliformisamine A (**1**) based on NADPH-dependent degradation profiles in mouse liver microsomes. (B) Metabolic stability of **1** (mean  $\pm$  SD;  $n = 3$ ; 0 – 30 min) in mouse liver microsomes: LN-transformed data.

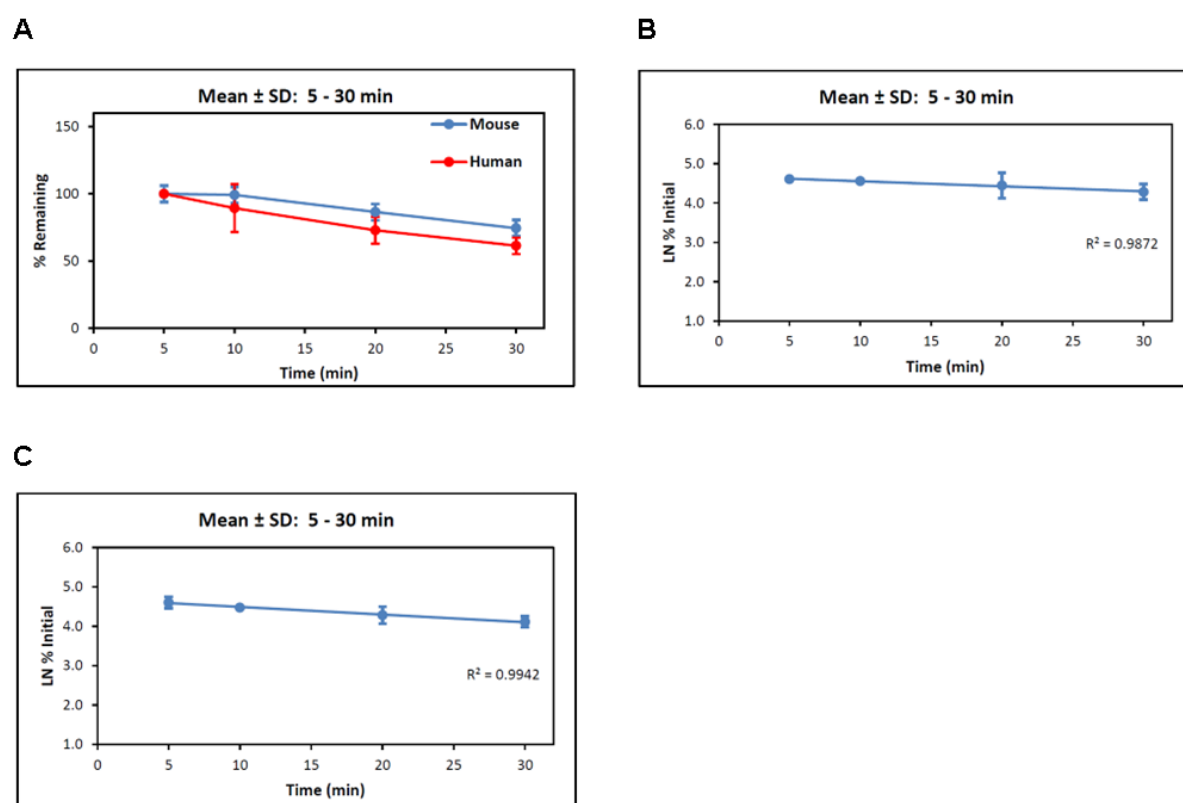

**Figure S2.** (A) Metabolic stability of ianthelliformisamine B (**2**) (mean  $\pm$  SD;  $n = 3$ ) in mouse and human liver microsomes. (B) Metabolic stability of **2** (mean  $\pm$  SD;  $n = 3$ ) in mouse liver microsomes: LN-transformed data (normalized to  $t = 5$  min). (C) Metabolic stability of **2** (mean  $\pm$  SD;  $n = 3$ ) in human liver microsomes: LN-transformed data (normalized to  $t = 5$  min).

**A**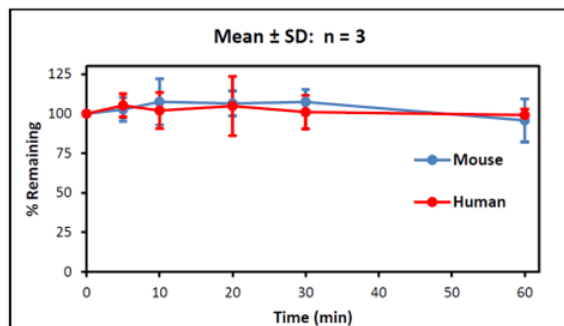**B**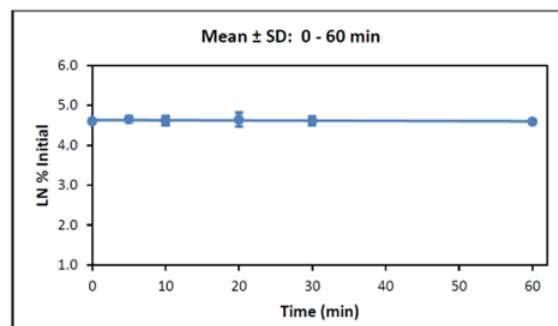**C**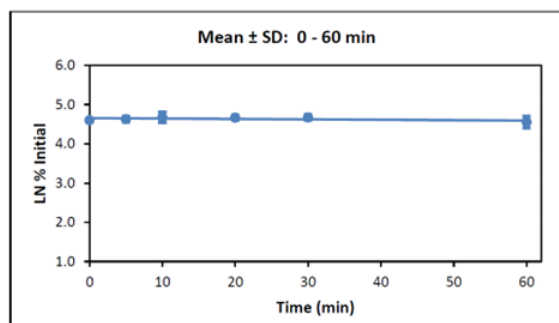

**Figure S3.** (A) Metabolic stability of ianthelliformisamine C (**3**) (mean  $\pm$  SD; n = 3) in mouse and human liver microsomes. (B) Metabolic stability of **3** (mean  $\pm$  SD; n = 3) in human liver microsomes: LN-transformed data. (C) Metabolic stability of **3** (mean  $\pm$  SD; n = 3) in mouse liver microsomes: LN-transformed data.

## Supplementary Data

### Ianthelliformisamine A

- Mouse liver microsomes

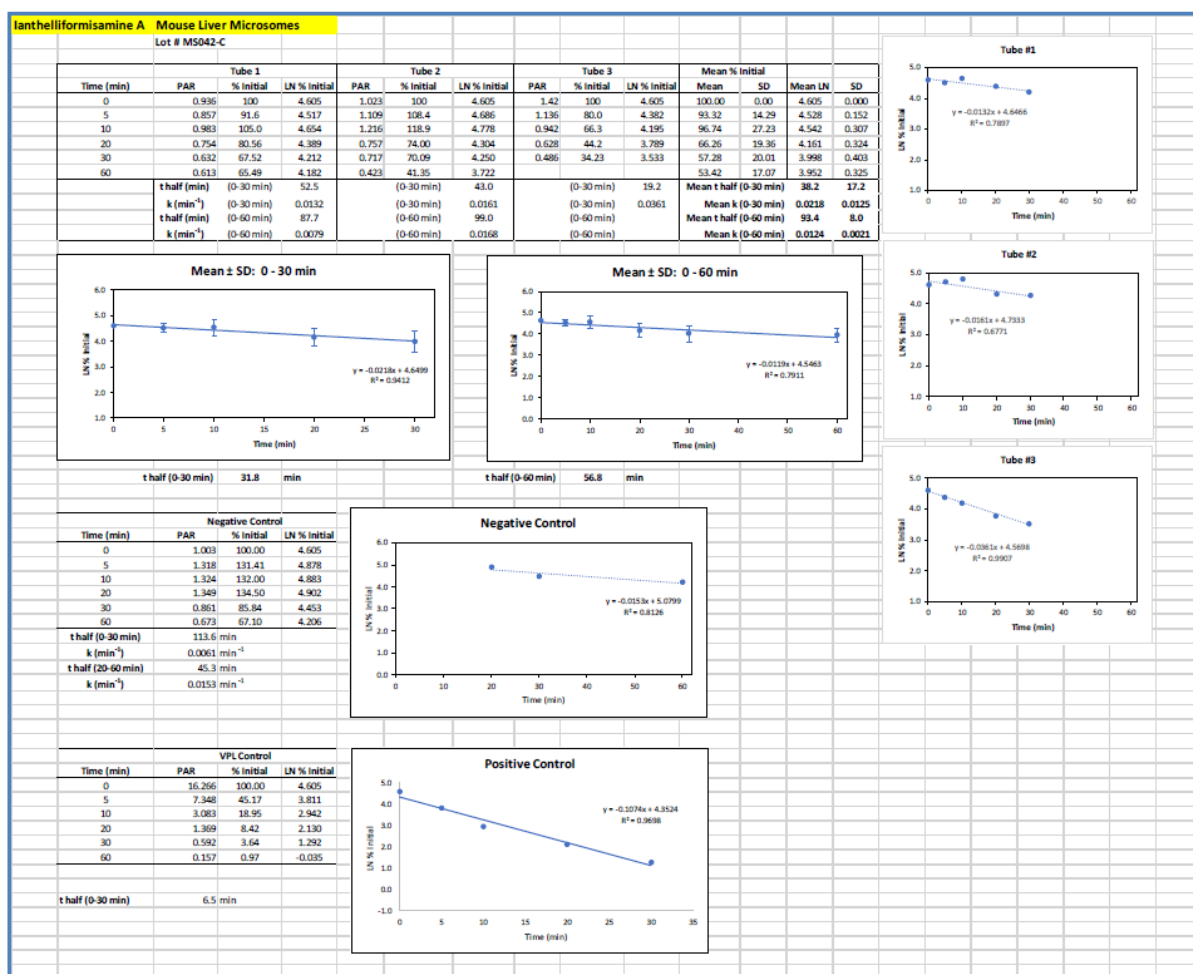

# Ianthelliformisamine B

- Mouse liver microsomes

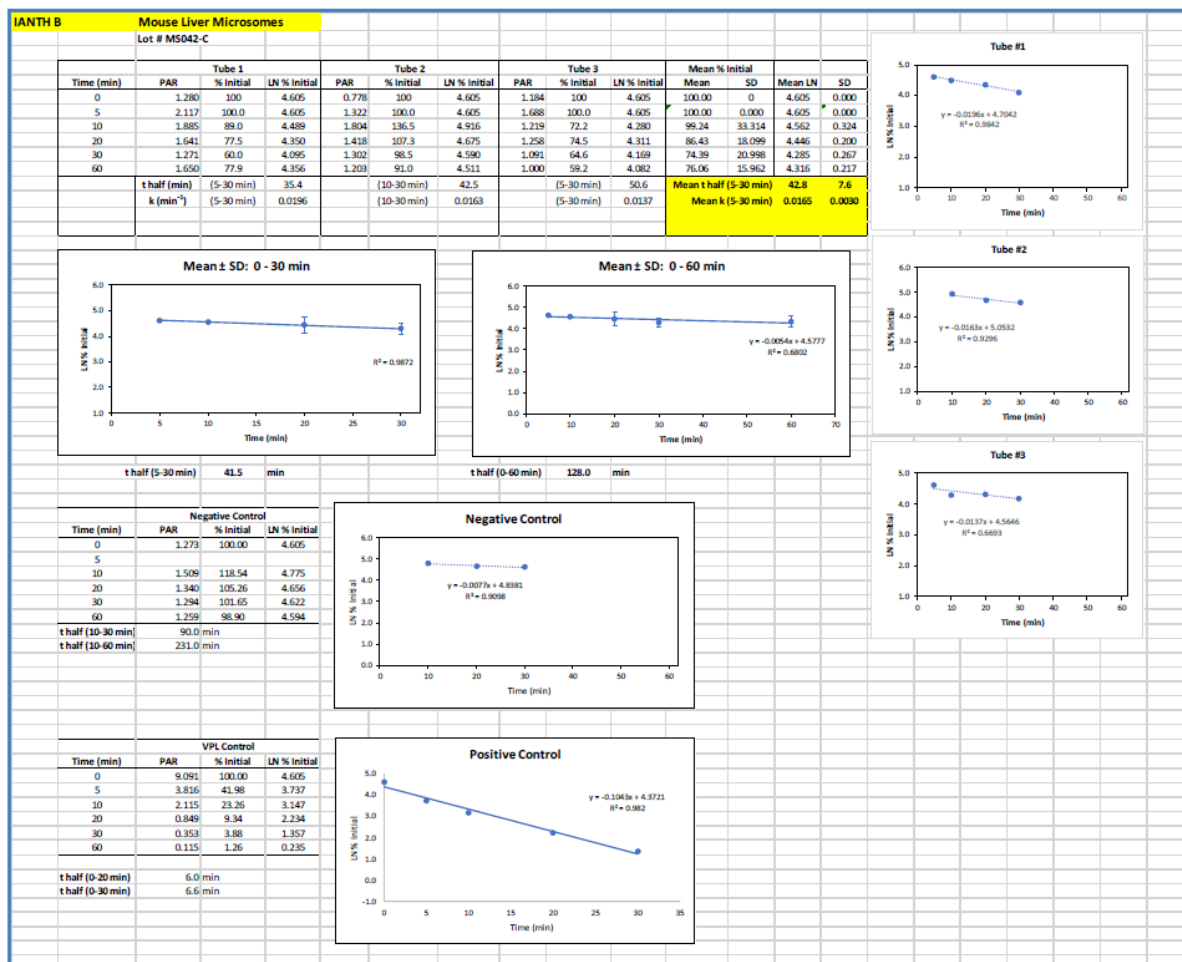



- Human liver microsomes

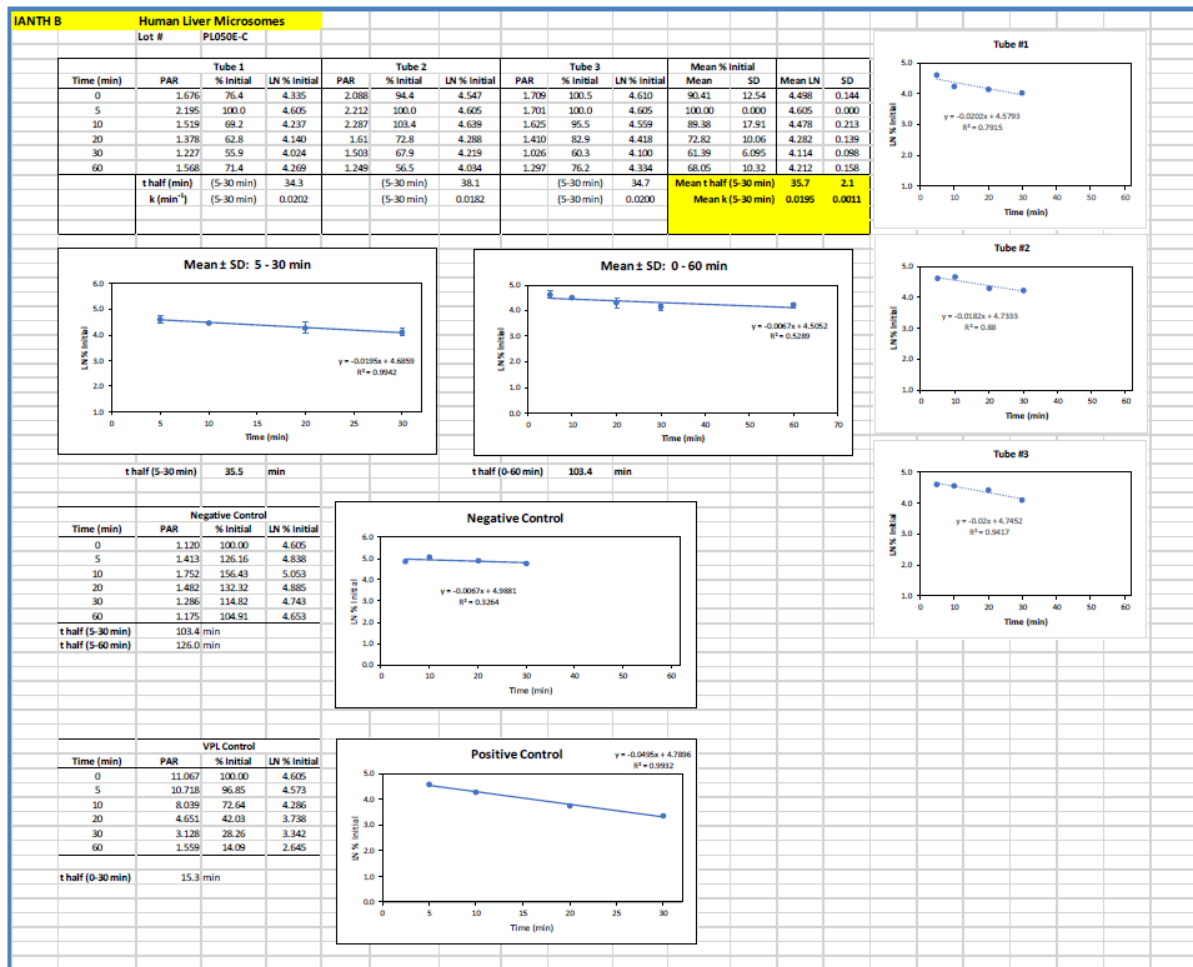

# Ianthelliformisamine C

- Mouse liver microsomes

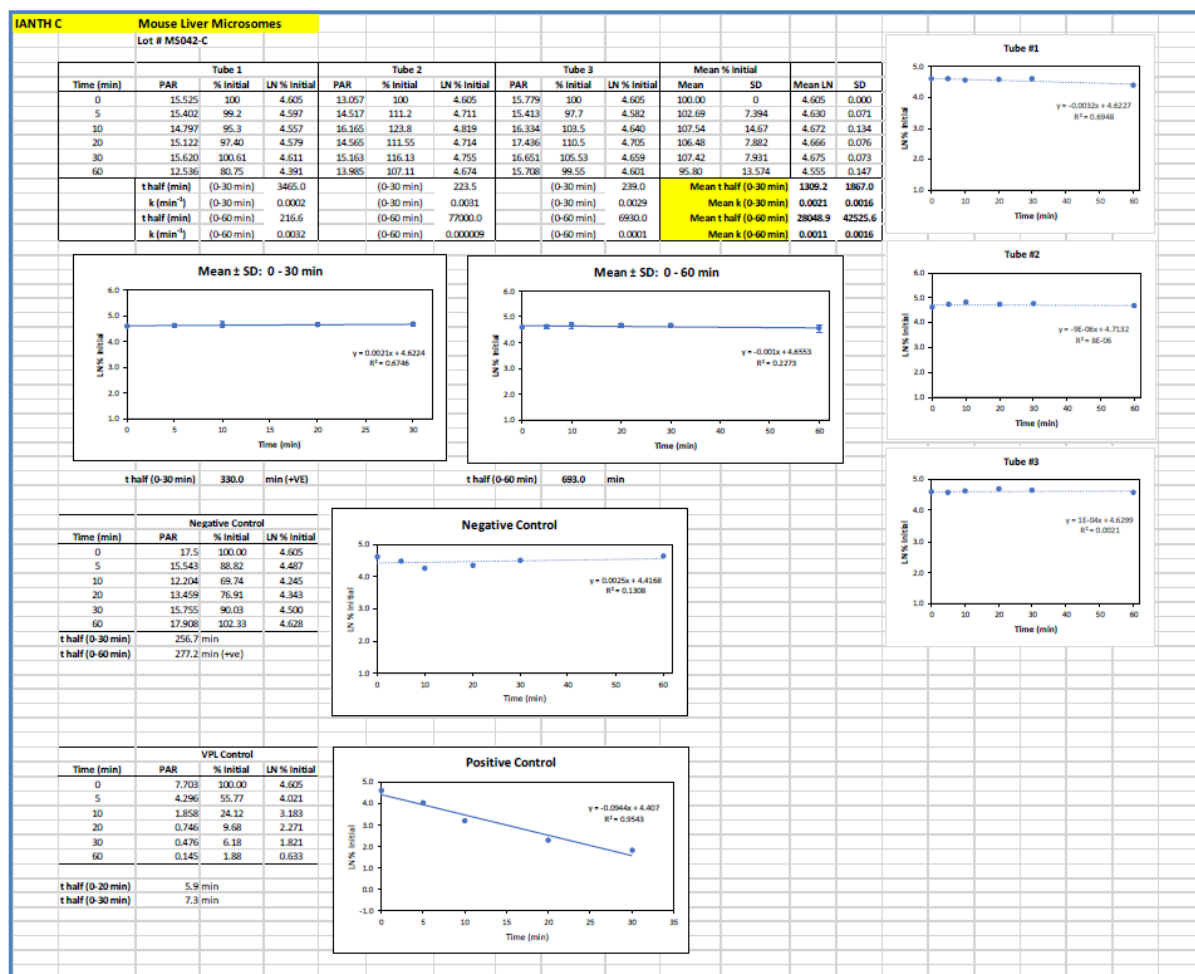

- Human liver microsomes

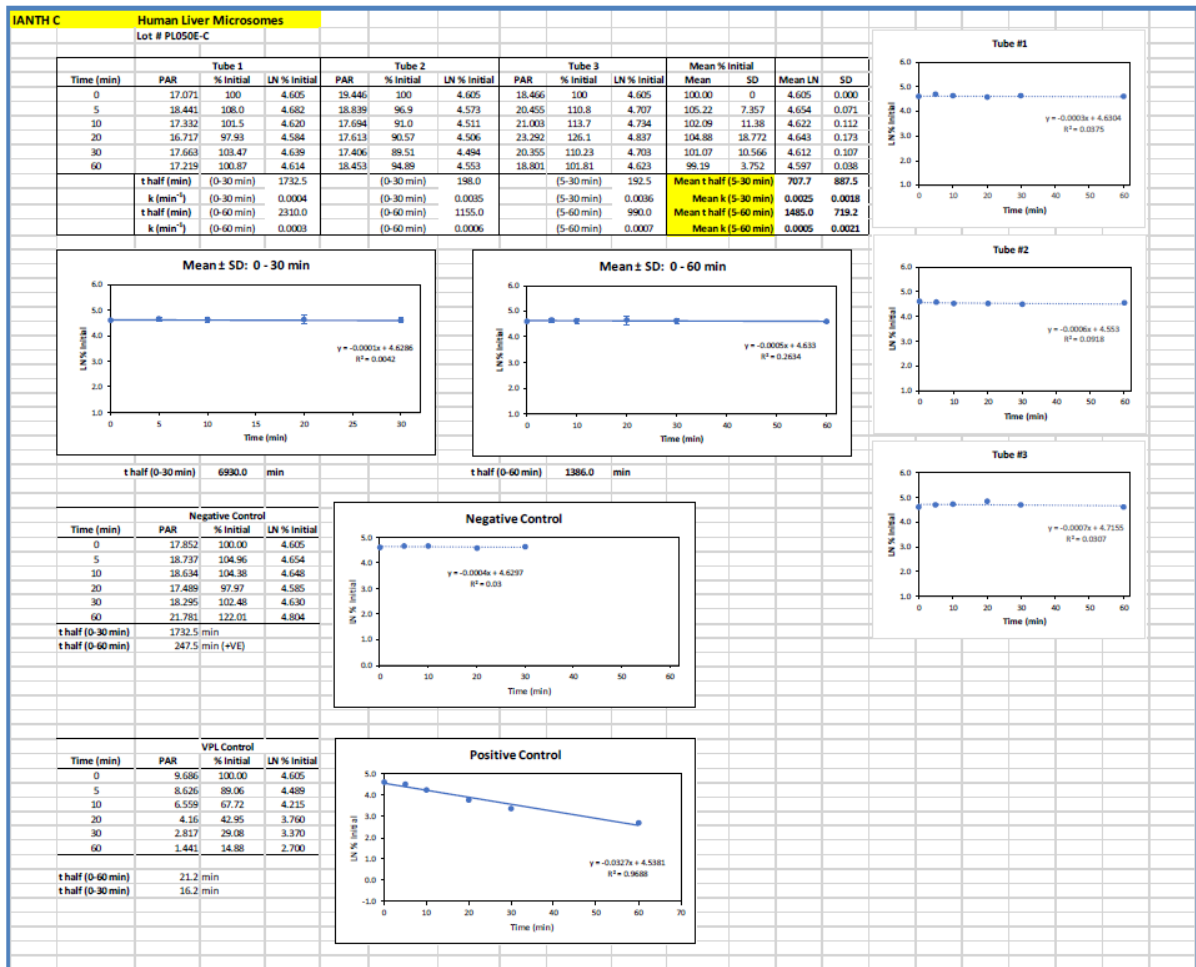

Supplement: s1 [file s1]
